# Supplementary material for: Co-delivery of doxorubicin and curcumin by polymeric micelles for improving antitumor efficacy on breast carcinoma
Source: Royal Society of Chemistry journal article supplement (doi:10.1039/c4ra07453j), 2014-01-01
Supplement: c4ra07453j1.pdf [file c4ra07453j1.pdf]

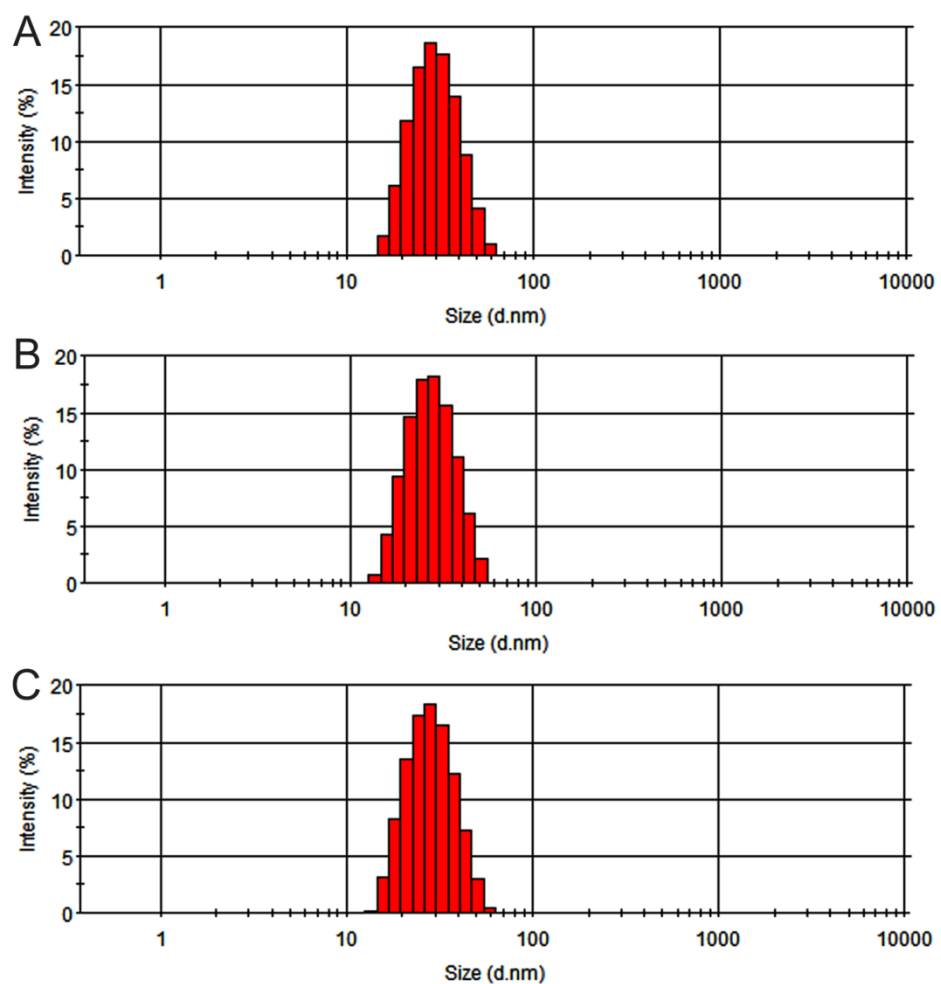

Figure S1 Particle size distribution of micelles (A), Dox-M (B) and Cur-M (C).

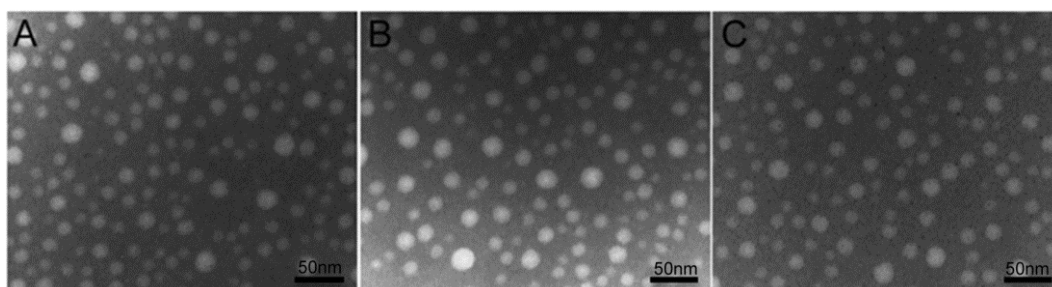

Figure S2 TEM image of blank micelles (A), Dox- M (B) and Cur-M (C).
